# Supplementary material for: Understanding the advantage of hexagonal WO3as an efficient photoanode for solar water splitting: a first-principles perspective
Source: Royal Society of Chemistry journal article supplement (doi:10.1039/c6ta03659g), 2016-01-01
Supplement: c6ta03659g1.pdf [file c6ta03659g1.pdf]

**Supplementary Information:**

**Understanding the advantage of hexagonal WO<sub>3</sub> as an efficient photoanode for solar water splitting: A first-principles perspective**

Taehun Lee,<sup>a)</sup> Yonghyuk Lee,<sup>a)</sup> Woosun Jang, and Aloysius Soon<sup>b)</sup>

*Global E<sup>3</sup> Institute and Department of Materials Science and Engineering,  
Yonsei University, Seoul 120-749, Korea*

(Dated: 22 June 2016)

---

<sup>a)</sup>These authors contributed equally to this work.

<sup>b)</sup>Corresponding author. E-mail: aloysius.soon@yonsei.ac.kr

TABLE S1. Surface free energies of various considered  $h$ - $\text{WO}_3$  surface structures with diverse orientations and terminations at corresponding stoichiometric ratio  $R_{\text{W/O}}$ , which is the ratio of the number of W atoms to that of oxygen in the surface structure. A stoichiometric surface will have  $R_{\text{W/O}} = 2$ . Surface energies at both the oxygen-lean ( $\gamma_{\text{O-lean}}$ ) and oxygen-rich ( $\gamma_{\text{O-rich}}$ ) limits are reported in  $\text{eV}/\text{\AA}^2$ . Each surface unit cell (0001), (10 $\bar{1}$ 0), and, (11 $\bar{2}$ 0) areas correspond to 48.191, 28.607, and, 49.549 in  $\text{\AA}^2$ .

| Surfaces         |                           | $R_{\text{W/O}}$ | $\gamma_{\text{O-lean}}$ |         | $\gamma_{\text{O-rich}}$ |         |
|------------------|---------------------------|------------------|--------------------------|---------|--------------------------|---------|
|                  |                           |                  | relax                    | unrelax | relax                    | unrelax |
| (0001)           | $\text{WO}_6$             | 0.316            | 0.175                    | 0.201   | 0.078                    | 0.105   |
|                  | $\text{WO}_5$             | 0.353            | 0.011                    | 0.074   | 0.108                    | 0.170   |
| (10 $\bar{1}$ 0) | $\text{W}_a\text{O}_6$    | 0.304            | 0.205                    | 0.219   | 0.097                    | 0.111   |
|                  | $\text{W}_a\text{O}_5$    | 0.333            | 0.041                    | 0.106   | 0.041                    | 0.106   |
|                  | $\text{W}_a\text{O}_4$    | 0.368            | 0.048                    | 0.104   | 0.157                    | 0.213   |
|                  | $\text{W}_b\text{O}_6$    | 0.314            | 0.198                    | 0.228   | 0.089                    | 0.120   |
|                  | $\text{W}_b\text{O}_{5a}$ | 0.355            | 0.014                    | 0.089   | 0.123                    | 0.197   |
|                  | $\text{W}_b\text{O}_{5b}$ | 0.333            | 0.081                    | 0.229   | 0.081                    | 0.229   |
|                  | $\text{W}_b\text{O}_4$    | 0.379            | 0.085                    | 0.181   | 0.302                    | 0.398   |
| (11 $\bar{2}$ 0) | $\text{W}_a\text{O}_6$    | 0.311            | 0.231                    | 0.259   | 0.105                    | 0.134   |
|                  | $\text{W}_a\text{O}_5$    | 0.322            | 0.123                    | 0.190   | 0.061                    | 0.127   |
|                  | $\text{W}_a\text{O}_4$    | 0.333            | 0.075                    | 0.168   | 0.075                    | 0.168   |
|                  | $\text{W}_b\text{O}_6$    | 0.309            | 0.232                    | 0.253   | 0.106                    | 0.128   |
|                  | $\text{W}_b\text{O}_5$    | 0.333            | 0.044                    | 0.126   | 0.044                    | 0.126   |
|                  | $\text{W}_b\text{O}_4$    | 0.362            | 0.052                    | 0.117   | 0.177                    | 0.242   |

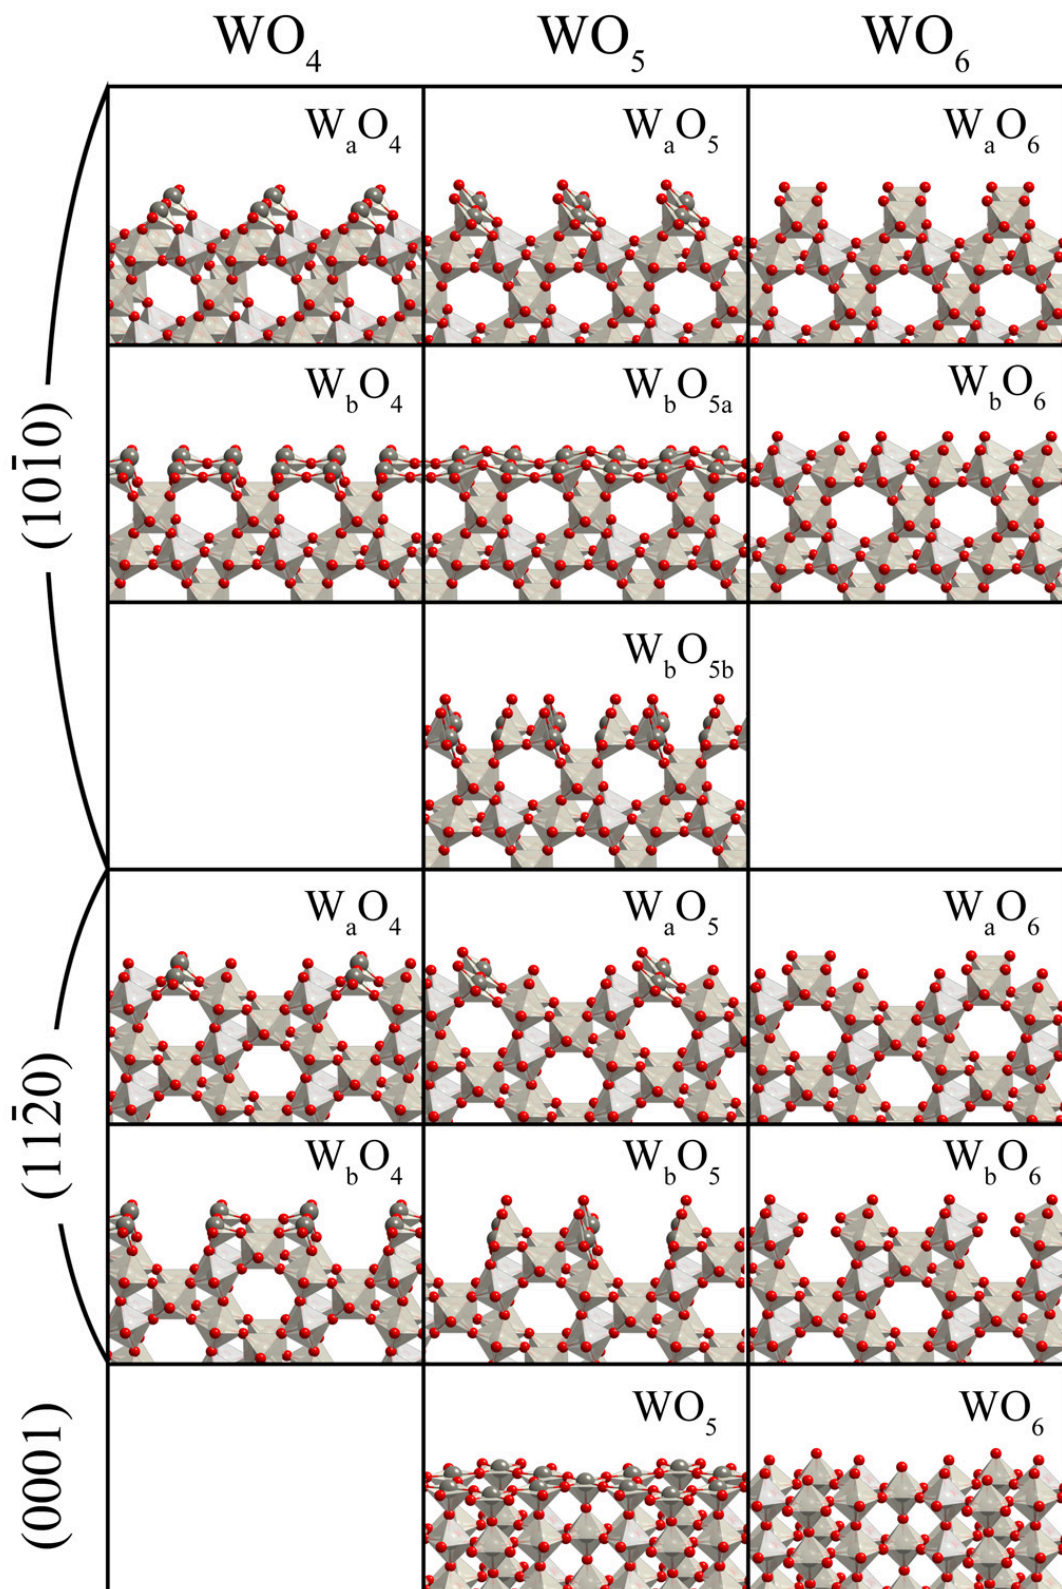

FIG. S1. (Color online) Surface structures of  $h$ - $\text{WO}_3$  before structural relaxation.

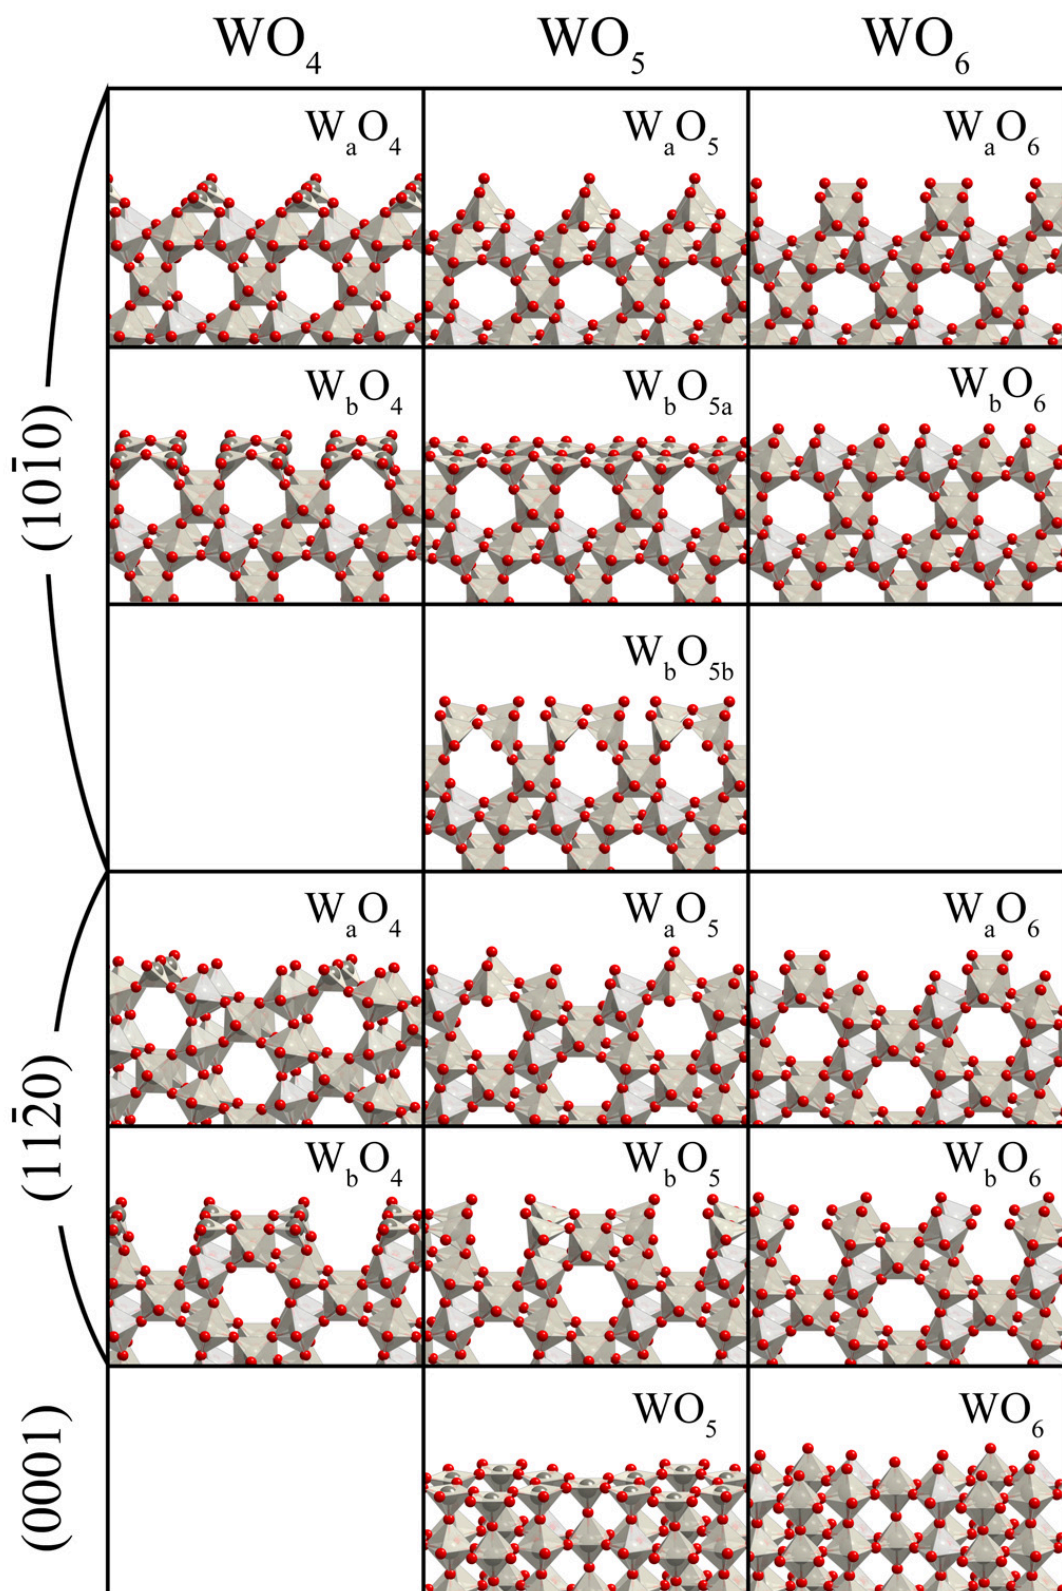

FIG. S2. (Color online) Surface structures of  $h$ - $WO_3$  after structural relaxation.

TABLE S2. PBE results of surface free energies in various considered  $h$ - $\text{WO}_3$  surface structures with diverse orientations and terminations at corresponding stoichiometric ratio  $R_{\text{W/O}}$ , which is the ratio of the number of W atoms to that of oxygen in the surface structure. A stoichiometric surface will have  $R_{\text{W/O}} = 2$ . Surface energies at both the oxygen-lean ( $\gamma_{\text{O-lean}}$ ) and oxygen-rich ( $\gamma_{\text{O-rich}}$ ) limits are reported in  $\text{eV}/\text{\AA}^2$ . Each surface unit cell (0001), (10 $\bar{1}$ 0), and, (11 $\bar{2}$ 0) areas correspond to 48.287, 28.669, and, 49.656 in  $\text{\AA}^2$ .

| Surfaces         |                           | $R_{\text{W/O}}$ | $\gamma_{\text{O-lean}}$ |         | $\gamma_{\text{O-rich}}$ |         |
|------------------|---------------------------|------------------|--------------------------|---------|--------------------------|---------|
|                  |                           |                  | relax                    | unrelax | relax                    | unrelax |
| (0001)           | $\text{WO}_6$             | 0.316            | 0.159                    | 0.188   | 0.072                    | 0.100   |
|                  | $\text{WO}_5$             | 0.353            | 0.003                    | 0.064   | 0.090                    | 0.151   |
| (10 $\bar{1}$ 0) | $\text{W}_a\text{O}_6$    | 0.304            | 0.191                    | 0.204   | 0.093                    | 0.106   |
|                  | $\text{W}_a\text{O}_5$    | 0.333            | 0.030                    | 0.094   | 0.030                    | 0.094   |
|                  | $\text{W}_a\text{O}_4$    | 0.368            | 0.039                    | 0.094   | 0.137                    | 0.192   |
|                  | $\text{W}_b\text{O}_6$    | 0.314            | 0.182                    | 0.215   | 0.084                    | 0.117   |
|                  | $\text{W}_b\text{O}_{5a}$ | 0.355            | 0.001                    | 0.078   | 0.099                    | 0.176   |
|                  | $\text{W}_b\text{O}_{5b}$ | 0.333            | 0.064                    | 0.214   | 0.064                    | 0.214   |
|                  | $\text{W}_b\text{O}_4$    | 0.379            | 0.073                    | 0.176   | 0.269                    | 0.372   |
| (11 $\bar{2}$ 0) | $\text{W}_a\text{O}_6$    | 0.311            | 0.214                    | 0.244   | 0.100                    | 0.131   |
|                  | $\text{W}_a\text{O}_5$    | 0.322            | 0.107                    | 0.177   | 0.050                    | 0.120   |
|                  | $\text{W}_a\text{O}_4$    | 0.333            | 0.062                    | 0.150   | 0.062                    | 0.150   |
|                  | $\text{W}_b\text{O}_6$    | 0.309            | 0.215                    | 0.237   | 0.102                    | 0.124   |
|                  | $\text{W}_b\text{O}_5$    | 0.333            | 0.032                    | 0.115   | 0.032                    | 0.115   |
|                  | $\text{W}_b\text{O}_4$    | 0.362            | 0.041                    | 0.108   | 0.154                    | 0.221   |

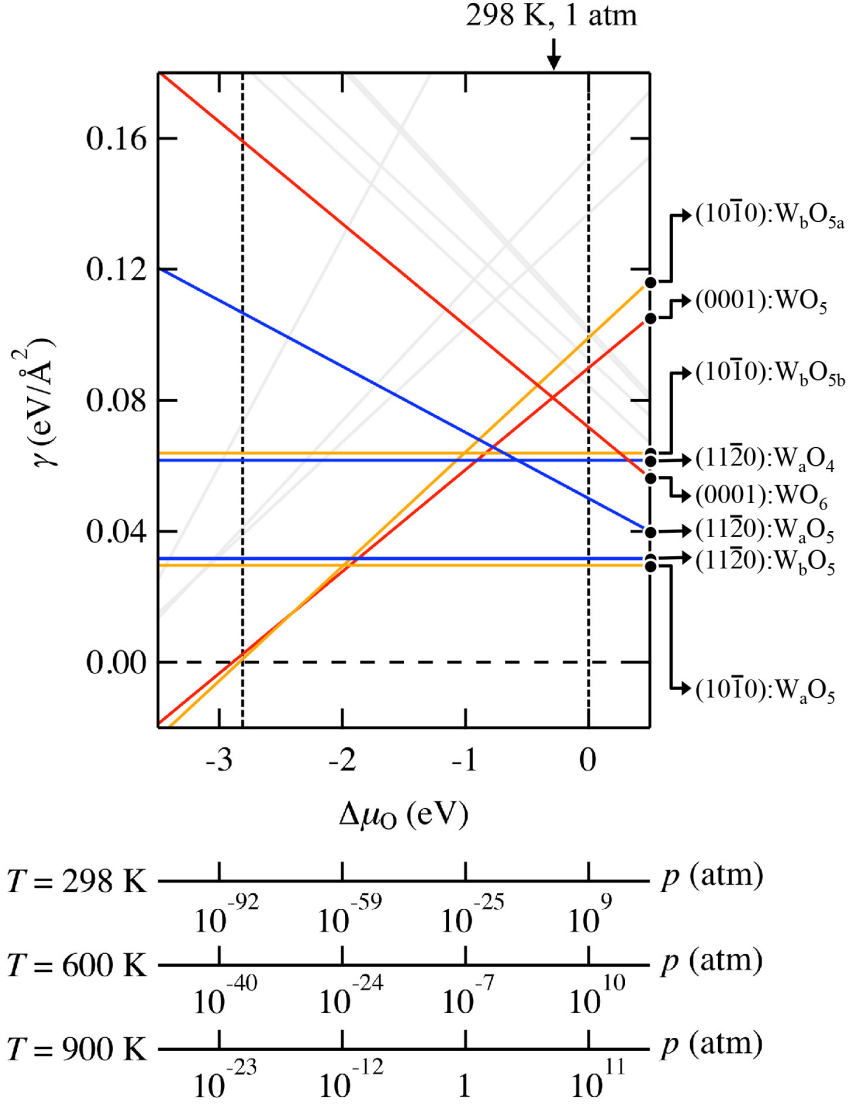

FIG. S3. (Color online) PBE results of calculated surface free energy (as a function of the change in the chemical potential of oxygen,  $\Delta\mu_{\text{O}}$ ) of most lowest low-index surfaces of  $h$ - $\text{WO}_3$ , with the corresponding temperature and pressure are shown in lower panel. Relatively stable structures and less stable structures are depicted in color lines and in grey lines, respectively.

(1) Experimental correction

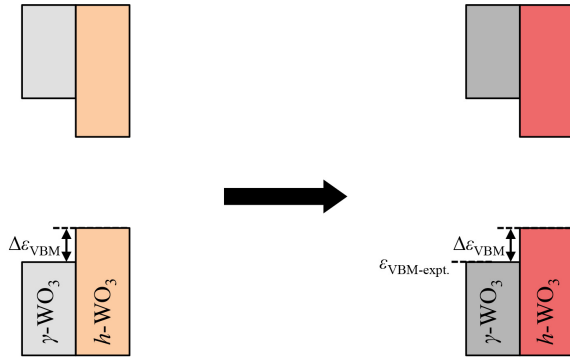

(a) Theoretically calculated band offsets ( $\Delta\epsilon_{\text{VBM}}$ ) of bulk  $\gamma\text{-WO}_3$  and  $h\text{-WO}_3$

(b) Experimentally measured VBM level of  $\gamma\text{-WO}_3$  ( $\epsilon_{\text{VBM-expt.}}$ ) and applied  $\Delta\epsilon_{\text{VBM}}$  to estimate the VBM of  $h\text{-WO}_3$

(2) Theoretical correction

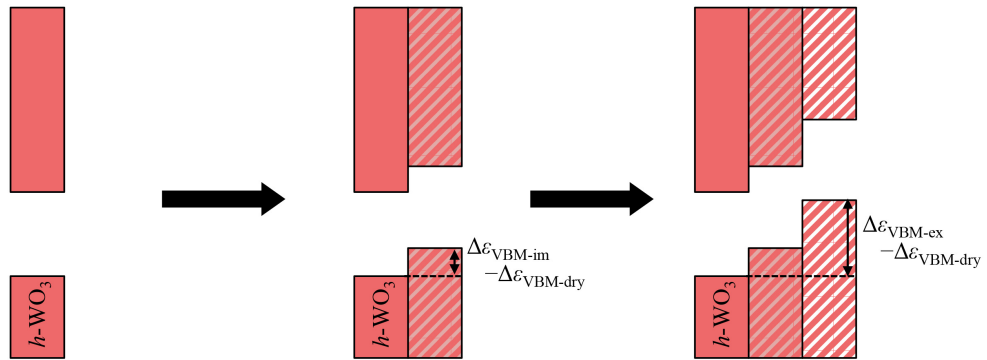

(a) Theoretically calculated  $h\text{-WO}_3$  surface band edge position in the vacuum environment

(b) Theoretically calculated  $h\text{-WO}_3$  surface band edge position with the implicit solvation model

(c) Apply theoretical reference of VBM shift in W-O system by using explicit solvation model

FIG. S4. (Color online) Methodologies of the corrections used in the manuscript for band edge positions of  $h\text{-WO}_3$ .
